# Supplementary material
Source: Springer Nature journal article supplement (https://www.springermedizin.de/resource/supplementary/12885_2013_4811_MOESM2_ESM.pdf/9467426)
Supplement: MOESM2 [file 9467426]

**Additional file 2: Knockdown of HSP70/MRJ has no obvious effects on cell proliferation and cell cycle.** (A) HCT116 mock cells and antisense-uPAR HCT116 cells were transfected with psiHSP70 and/or psiMRJ. Twenty-four hours later, all cells were harvested for flow cytometry analysis. The experiments were carried out independently in triplicate. (B) HCT116 mock cells and antisense-uPAR HCT116 cells were transfected with psiHSP70 and/or psiMRJ, and the cell viability was assessed by MTT assay. (C) MCF-7 and MB-MDA-231 cells were transfected with psiHSP70 and/or MRJ. Twenty-four hours later, cells were fixed and stained with PI for flow cytometry as described in Materials and Methods. DNA histograms were modeled with CellQuest analysis software. Phase percentages for G0/G1, S, and G2/M are depicted by bar graph. Data represent mean values of triplicate samples.
